# Supplementary material for: Proximal clustering between BK and CaV1.3 channels promotes functional coupling and BK channel activation at low voltage
Source: eLife journal article supplement (doi:10.7554/elife.28029), 2017-06-30
Supplement: supp [file elife-28029-supp-v1.zip]

Archive with 13 entries (13 files):
- elife_poa_e28029_Source_code_2_Sparklets_analysis.zip
- elife_poa_e28029_Figure_4_figure_supplement_1.pdf
- elife_poa_e28029_Figure_1_figure_supplement_2.pdf
- elife_poa_e28029_Figure_1_figure_supplement_1.pdf
- elife_poa_e28029_Figure_5_figure_supplement_1.pdf
- elife_poa_e28029_Figure_4_figure_supplement_4.pdf
- elife_poa_e28029_Figure_4_figure_supplement_2.pdf
- elife_poa_e28029_Source_code_1_Randomize_GSD_Particles.m
- elife_poa_e28029_Figure_4_figure_supplement_3.pdf
- elife_poa_e28029_Figure_5_figure_supplement_2.pdf
- elife_poa_e28029_Figure_2_figure_supplement_1.pdf
- elife_poa_e28029_Figure_5_figure_supplement_3.pdf
- elife_poa_e28029_Figure_4_figure_supplement_5.pdf
