# Supplementary material for: Proximal clustering between BK and CaV1.3 channels promotes functional coupling and BK channel activation at low voltage
Source: eLife journal article supplement (doi:10.7554/elife.28029), 2017-06-30

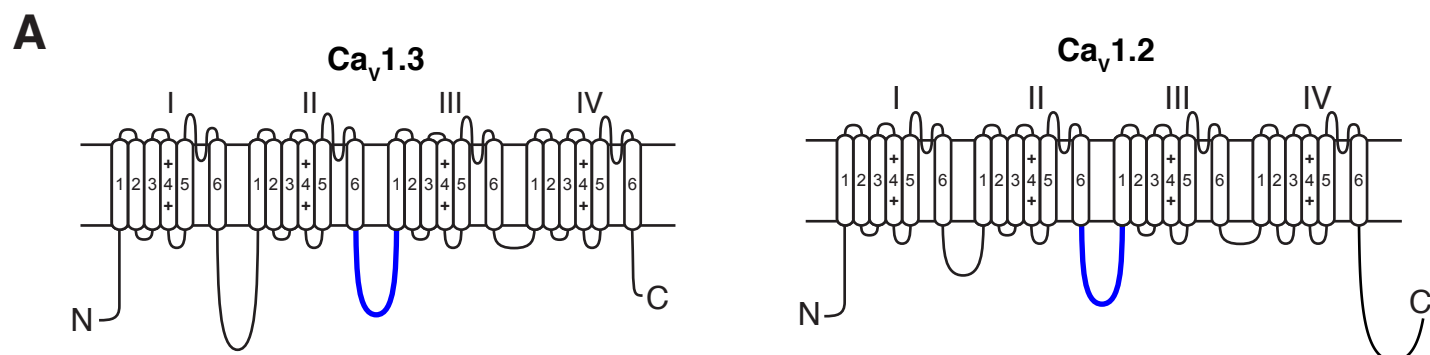

### II-III loop

**Ca<sub>v</sub>1.3** ADAESLNTAQKEEAEEKERKKIAR-----KESLENKKNNKPEVNQI-----AKYDNKVTIDDYQE-EAEDKDPYP  
**Ca<sub>v</sub>1.2** ADAESL TSAQKEEAEEKERKKLARTASPEKKQEVVGKPALEEAKEEKIELKSI TADGESKYTTKINMDDLQPNESEDKSPYP

### Anti-Ca<sub>v</sub>1.3 epitope

## B tsA-201 cell expressing Ca<sub>v</sub>1.3 and Ca<sub>v</sub>1.2-EGFP channels

■ Anti-Ca<sub>v</sub>1.3-Alexa 568 ■ Anti-GFP-Alexa 647

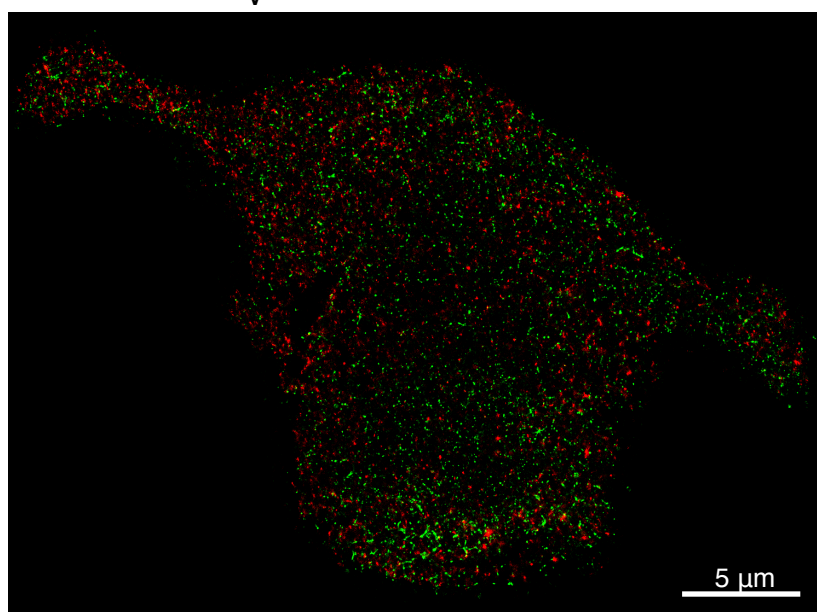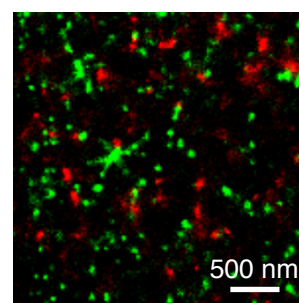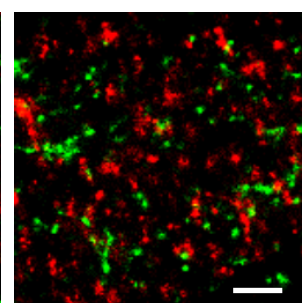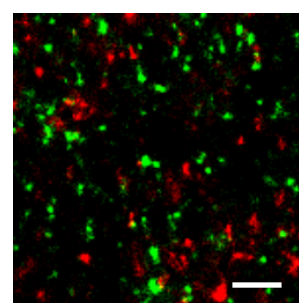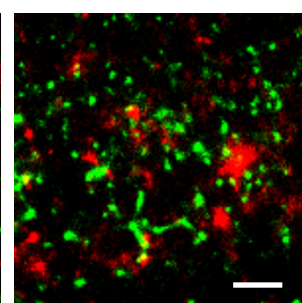

Supplement: supp [file elife-28029-supp-v1.zip]
