# Supplementary figures and images for: Proximal clustering between BK and CaV1.3 channels promotes functional coupling and BK channel activation at low voltage
Source: eLife journal article supplement (doi:10.7554/elife.28029), 2017-06-30

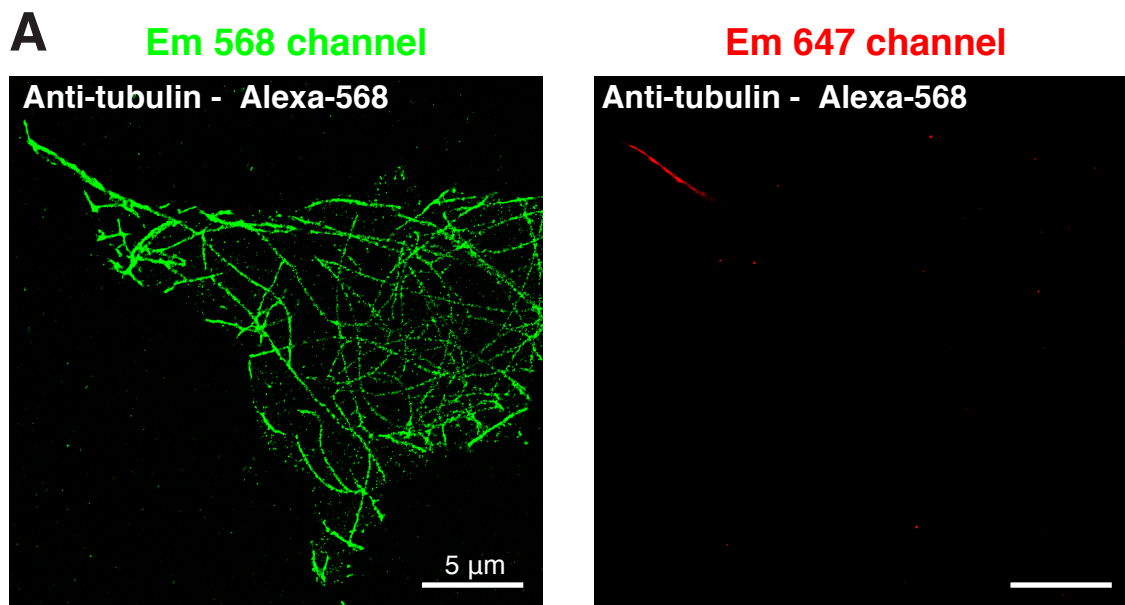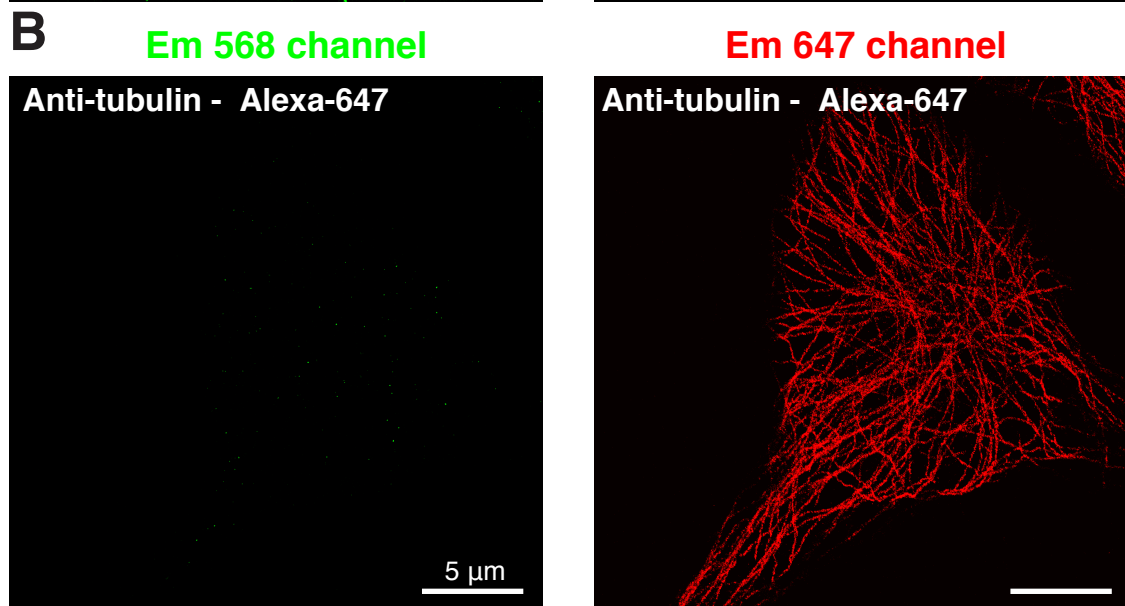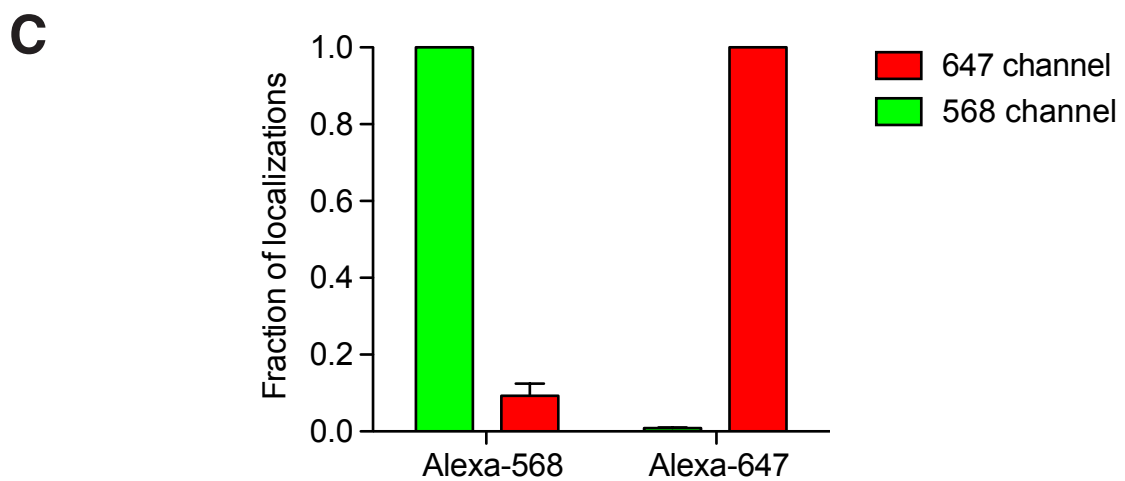

Supplement: supp [file elife-28029-supp-v1.zip]

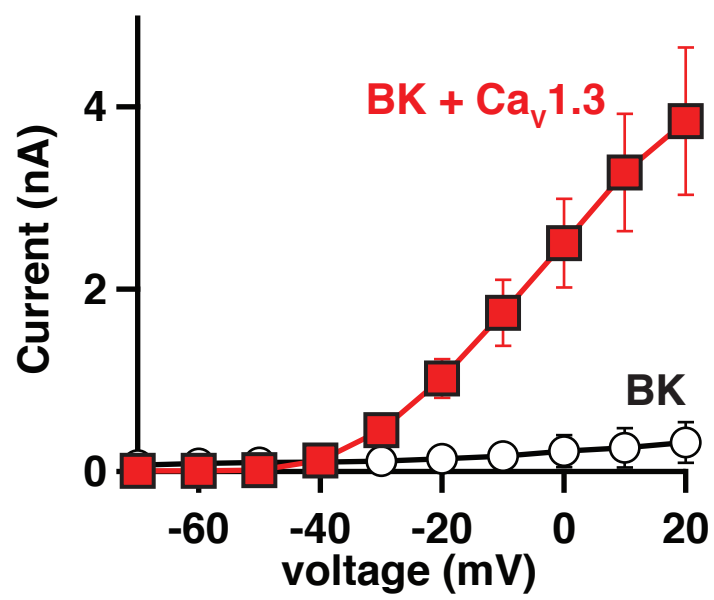

Supplement: supp [file elife-28029-supp-v1.zip]

**A**      ■ Anti- $\text{Ca}_v1.3$ -Alexa 568      ■ Anti-BK-Alexa 647

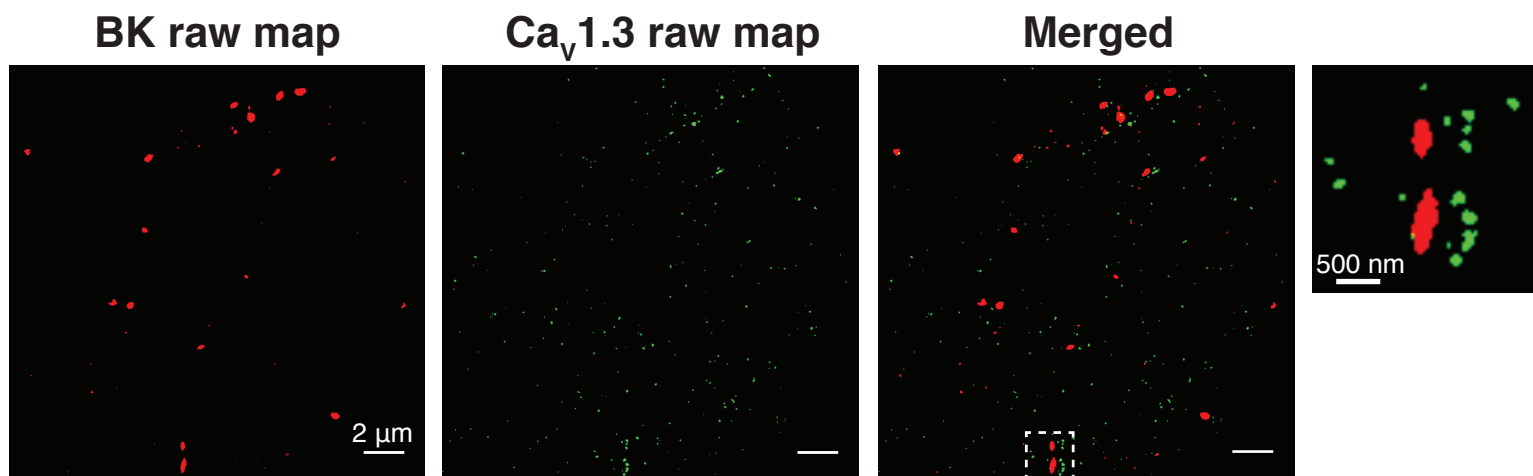

**B**      ■ Randomized clusters      ■ Anti-BK-Alexa 647

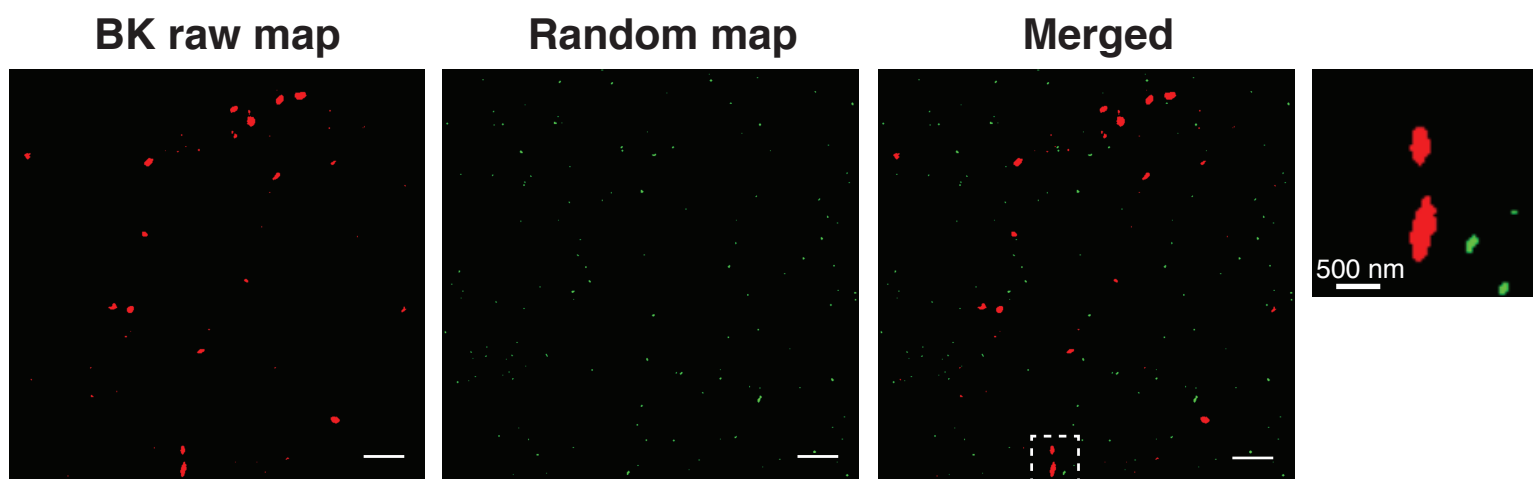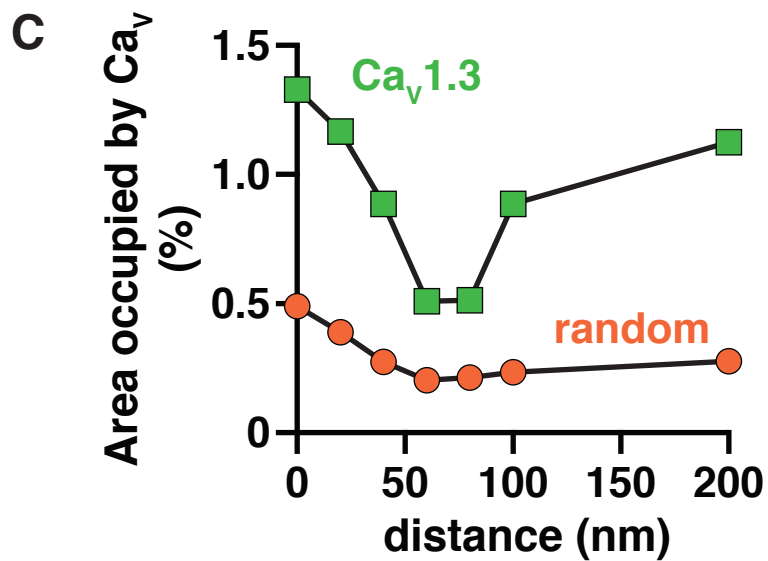

Supplement: supp [file elife-28029-supp-v1.zip]

**A**

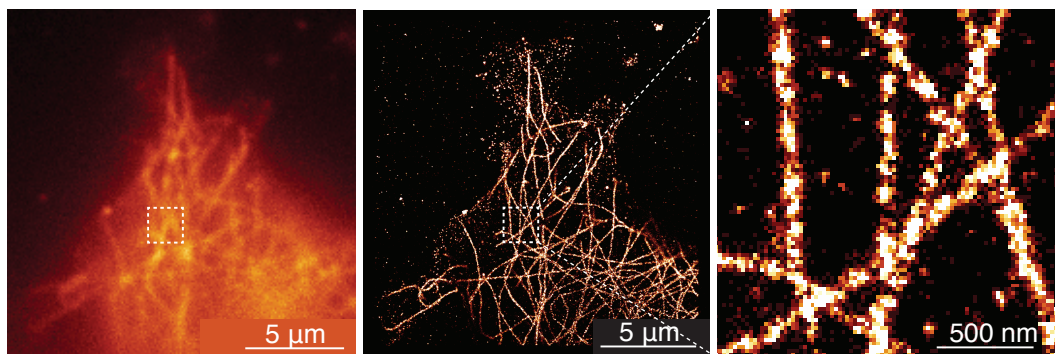

**B**

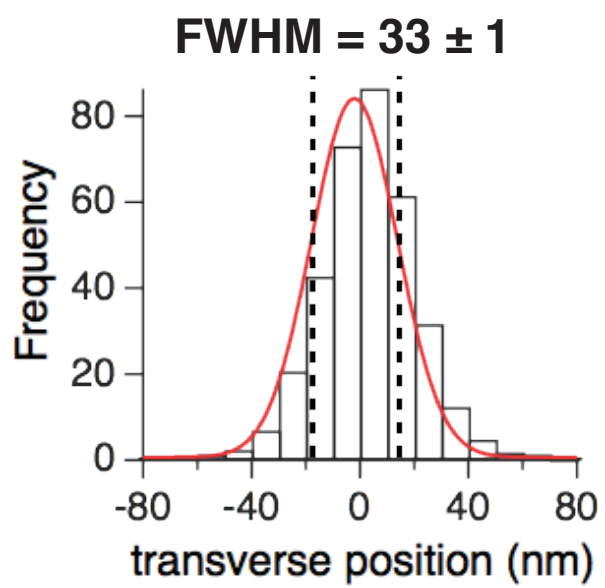

Supplement: supp [file elife-28029-supp-v1.zip]

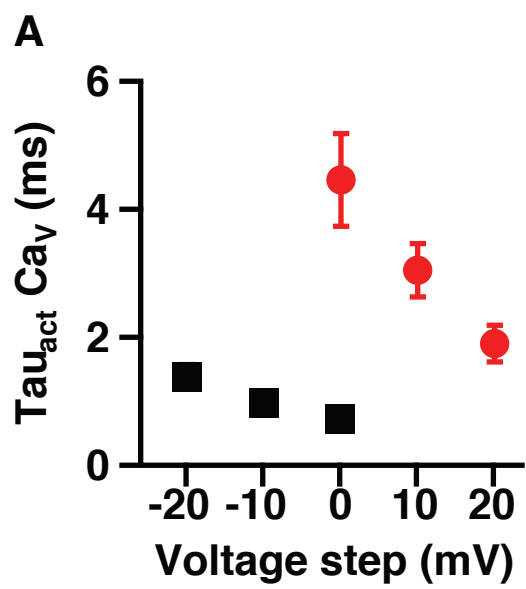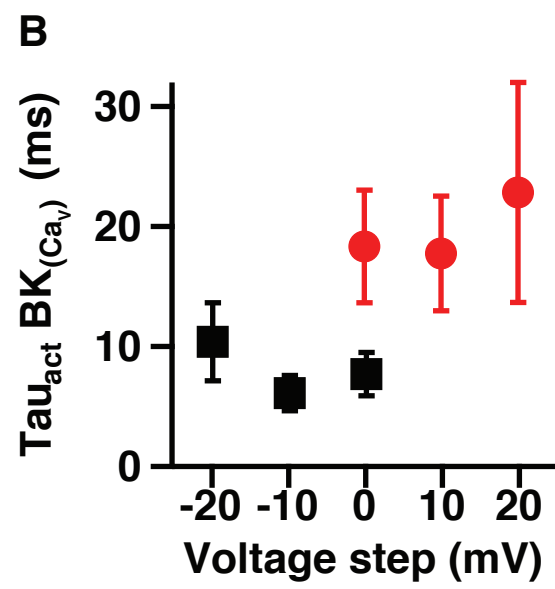

Supplement: supp [file elife-28029-supp-v1.zip › elife_poa_e28029_Figure_1_figure_supplement_2.pdf]

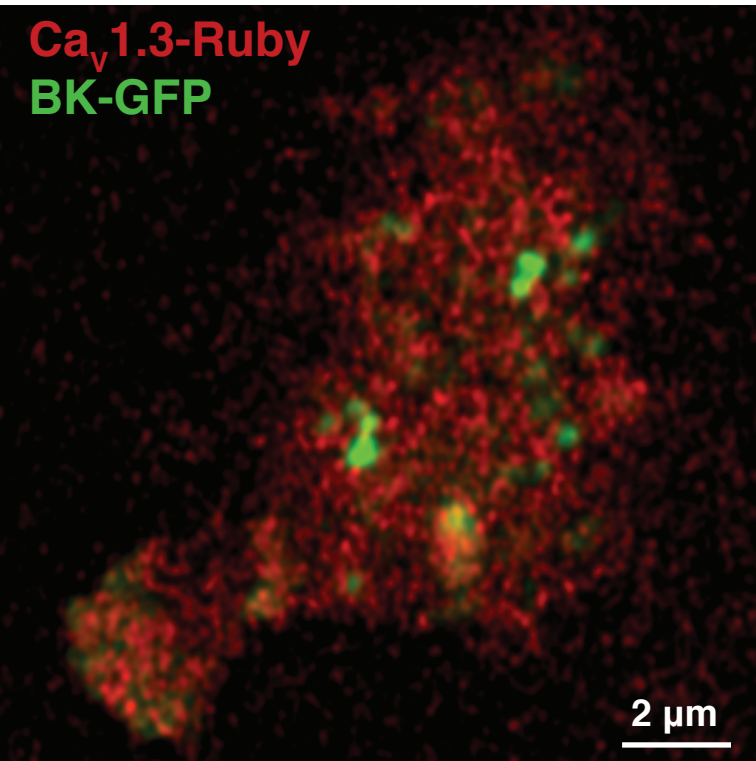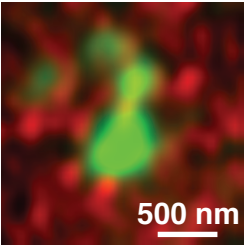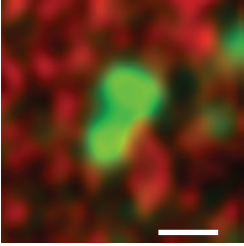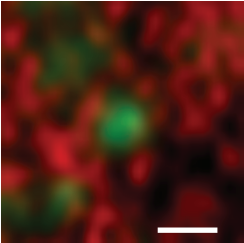

Supplement: supp [file elife-28029-supp-v1.zip › elife_poa_e28029_Figure_4_figure_supplement_4.pdf]

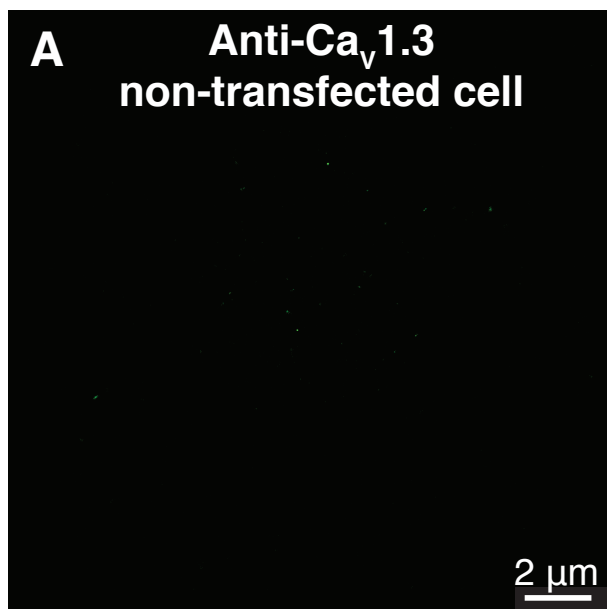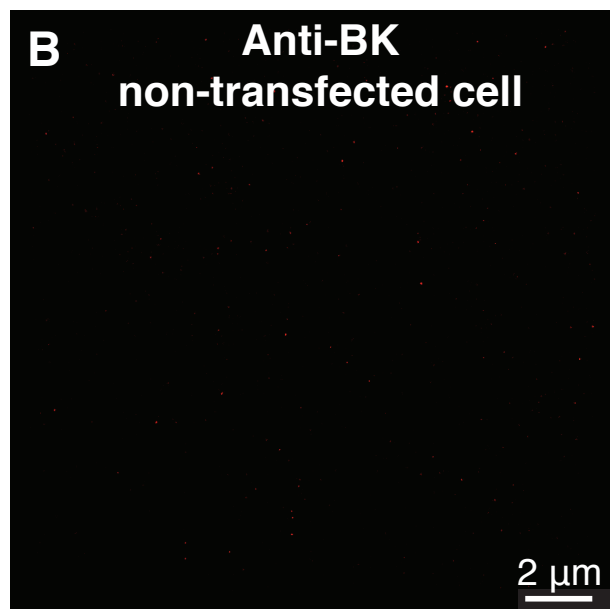

Supplement: supp [file elife-28029-supp-v1.zip › elife_poa_e28029_Figure_4_figure_supplement_3.pdf]

■ Anti-Ca<sub>v</sub>1.3-Alexa 647

■ Anti-BK-Alexa 568

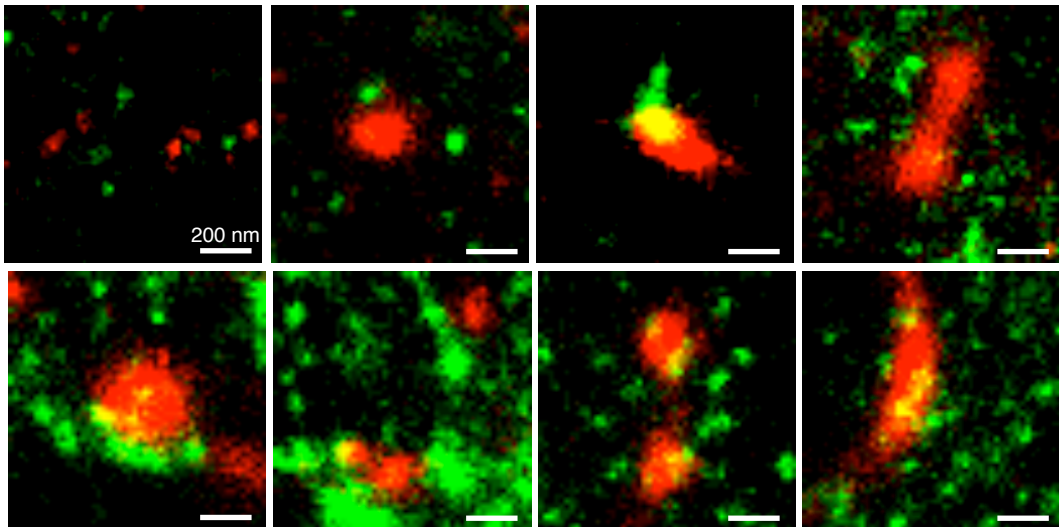

Supplement: supp [file elife-28029-supp-v1.zip › elife_poa_e28029_Figure_5_figure_supplement_2.pdf]

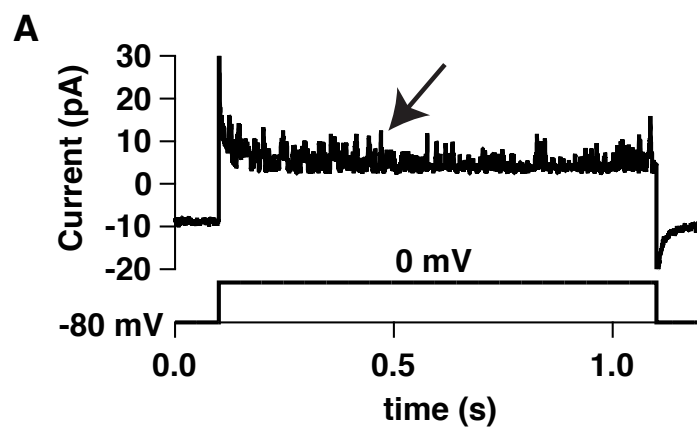

Supplement: supp [file elife-28029-supp-v1.zip › elife_poa_e28029_Figure_2_figure_supplement_1.pdf]

**A**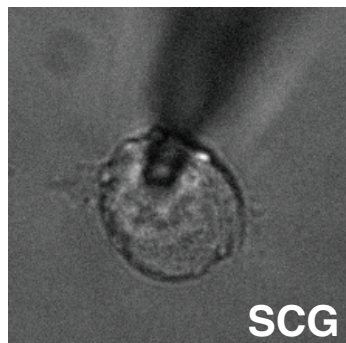**B**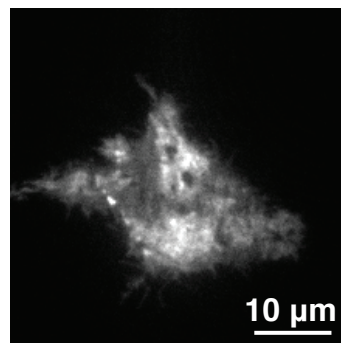**C****Control**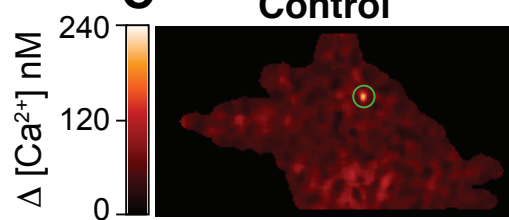**D****Bay K**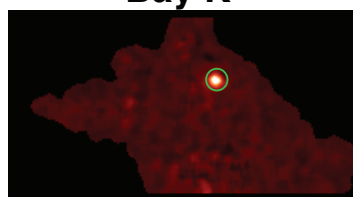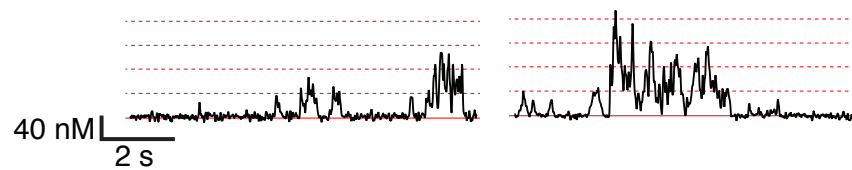

Supplement: supp [file elife-28029-supp-v1.zip › elife_poa_e28029_Figure_5_figure_supplement_3.pdf]
